# Supplementary material for: Linking the evolution of two prefrontal brain regions to social and foraging challenges in primates
Source: eLife journal article supplement (doi:10.7554/elife.87780), 2023-06-27
Supplement: supp3 [file elife-87780-supp3-v1.pdf]

Response: WB

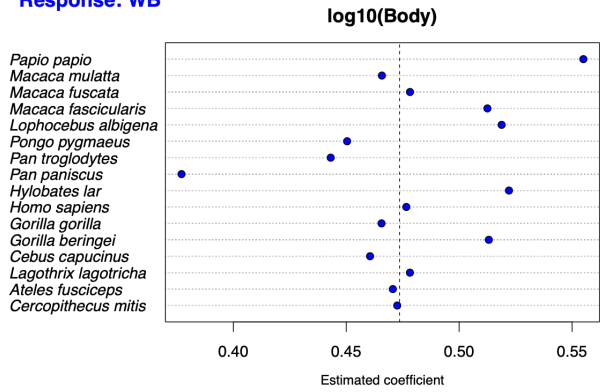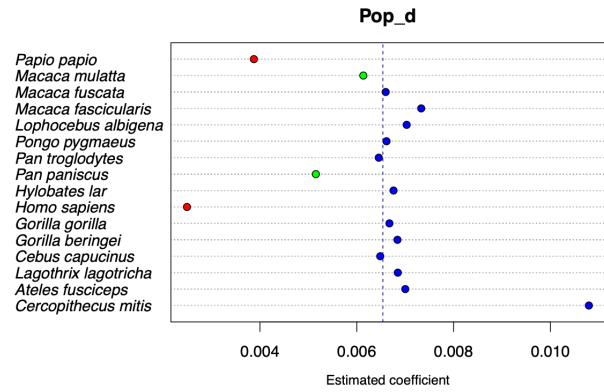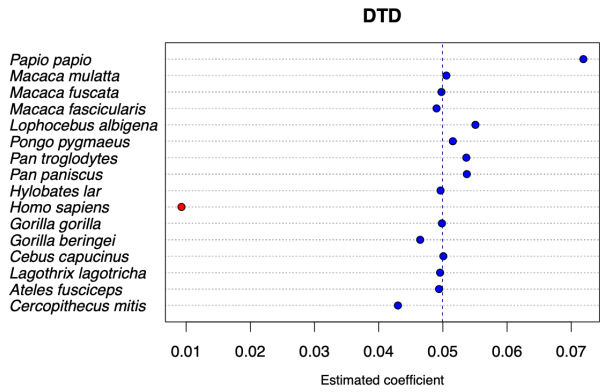

Each row shows the value of the coefficient after removing the species.

- $P > 0.1$
- $0.05 \leq P < 0.1$
- $P < 0.05$

The vertical dashed lines show the coefficients with all species.

MODEL WITH ALL SPECIES

|             | Value | Std.Error | t-value | p-value |
|-------------|-------|-----------|---------|---------|
| (Intercept) | 4.259 | 0.241     | 17.668  | 0       |
| log10(Body) | 0.474 | 0.153     | 3.103   | 0.009   |
| Pop_d       | 0.007 | 0.003     | 2.354   | 0.036   |
| DTD         | 0.05  | 0.012     | 4.075   | 0.002   |
