# Supplementary material for: Linking the evolution of two prefrontal brain regions to social and foraging challenges in primates
Source: eLife journal article supplement (doi:10.7554/elife.87780), 2023-06-27
Supplement: supp5 [file elife-87780-supp5-v1.pdf]

Response: FP

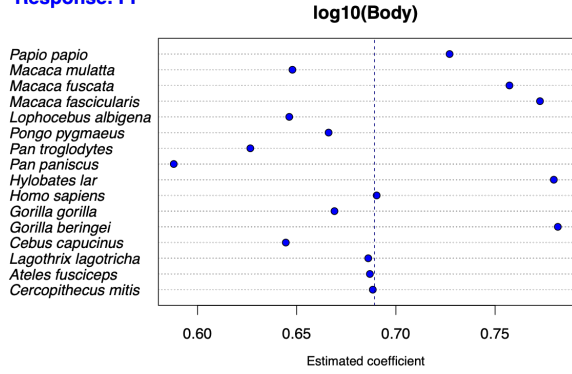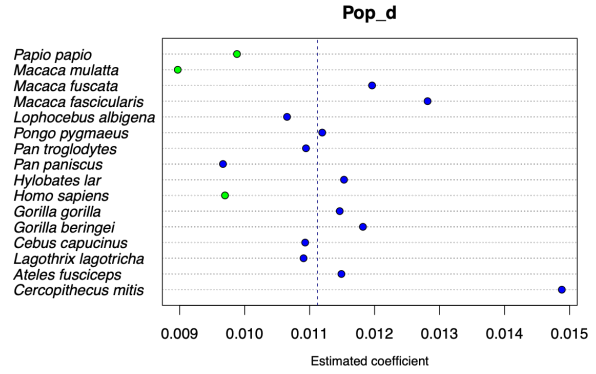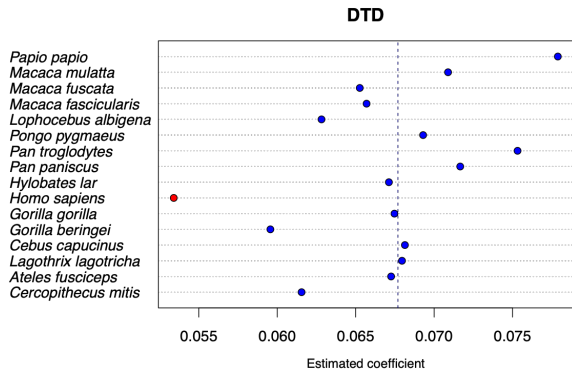

Each row shows the value of the coefficient after removing the species.

- $P > 0.1$
- $0.05 \leq P < 0.1$
- $P < 0.05$

The vertical dashed lines show the coefficients with all species.

MODEL WITH ALL SPECIES

|             | Value | Std.Error | t-value | p-value |
|-------------|-------|-----------|---------|---------|
| (Intercept) | 1.869 | 0.368     | 5.075   | 0       |
| log10(Body) | 0.689 | 0.233     | 2.955   | 0.012   |
| Pop_d       | 0.011 | 0.004     | 2.62    | 0.022   |
| DTD         | 0.068 | 0.019     | 3.615   | 0.004   |
