# Supplementary material for: Linking the evolution of two prefrontal brain regions to social and foraging challenges in primates
Source: eLife journal article supplement (doi:10.7554/elife.87780), 2023-06-27
Supplement: supp6 [file elife-87780-supp6-v1.pdf]

Response: DLPCF

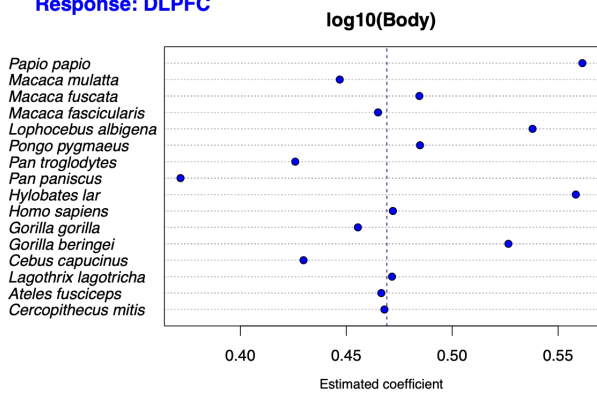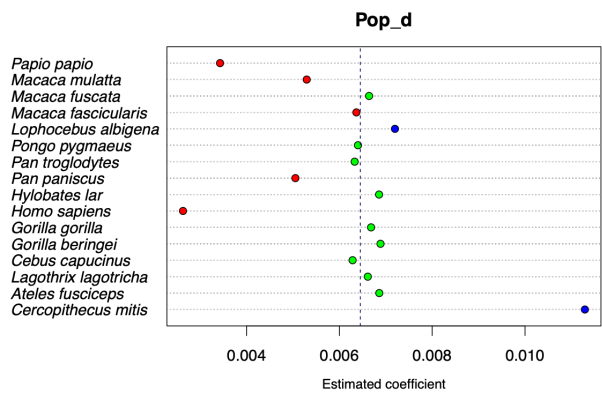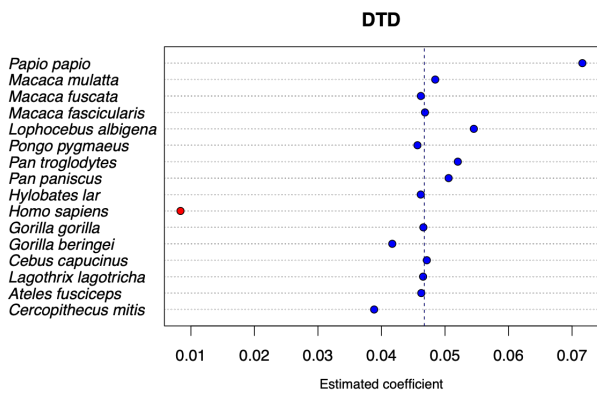

Each row shows the value of the coefficient after removing the species.

- $P > 0.1$
- $0.05 \leq P < 0.1$
- $P < 0.05$

The vertical dashed lines show the coefficients with all species.

MODEL WITH ALL SPECIES

|             | Value | Std.Error | t-value | p-value |
|-------------|-------|-----------|---------|---------|
| (Intercept) | 2.778 | 0.278     | 9.985   | 0       |
| log10(Body) | 0.469 | 0.176     | 2.663   | 0.021   |
| Pop_d       | 0.006 | 0.003     | 2.012   | 0.067   |
| DTD         | 0.047 | 0.014     | 3.305   | 0.006   |
